# Supplementary material for: Metabolome and Transcriptome Combinatory Profiling Reveals Fluconazole Resistance Mechanisms of Trichosporon asahii and the Role of Farnesol in Fluconazole Tolerance
Source: MDPI journal article supplement (doi:10.3390/microorganisms11112798), 2023-11-17
Supplement: s1 [file s1]

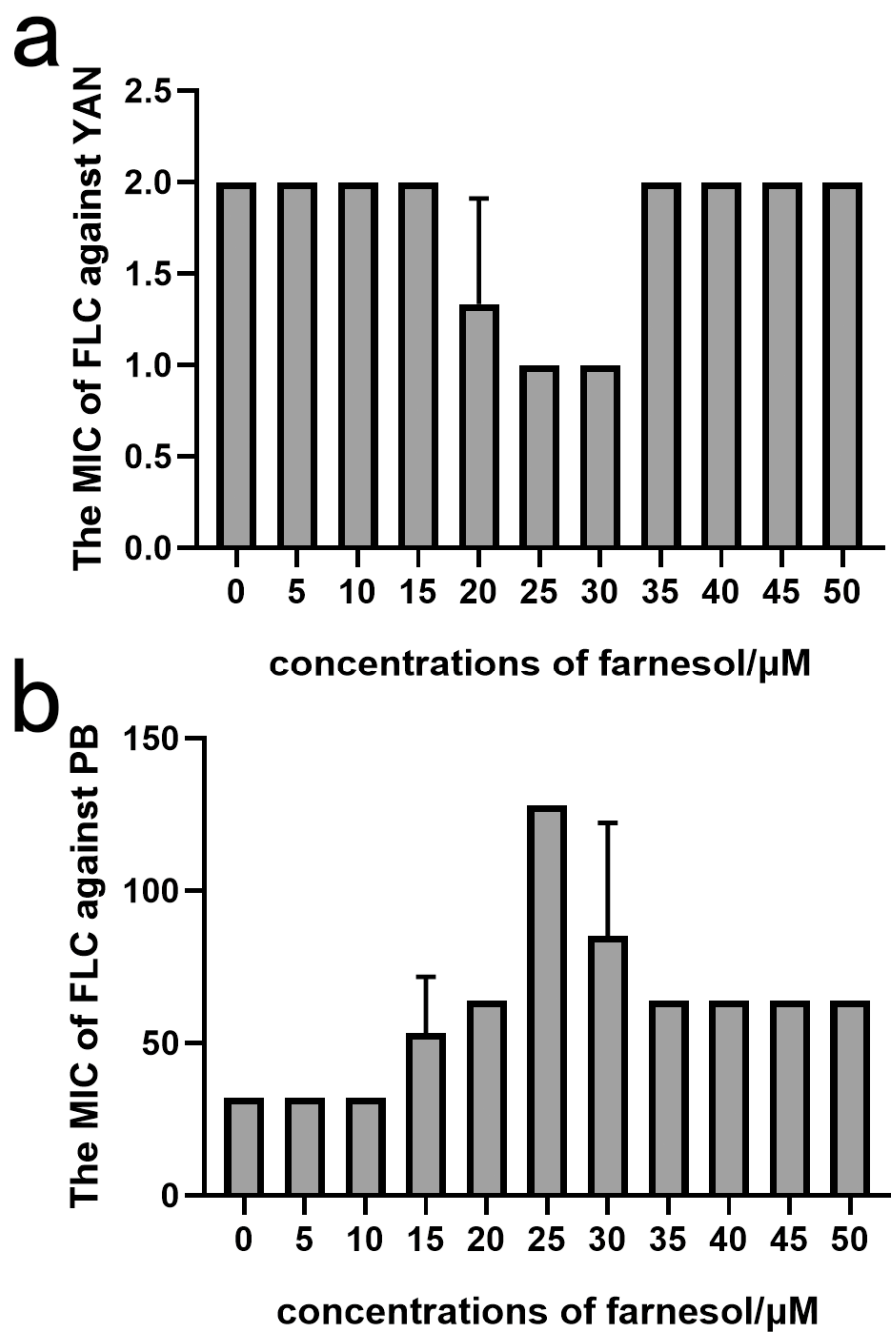

**Figure S1.** Effect of farnesol concentration on fluconazole resistance.

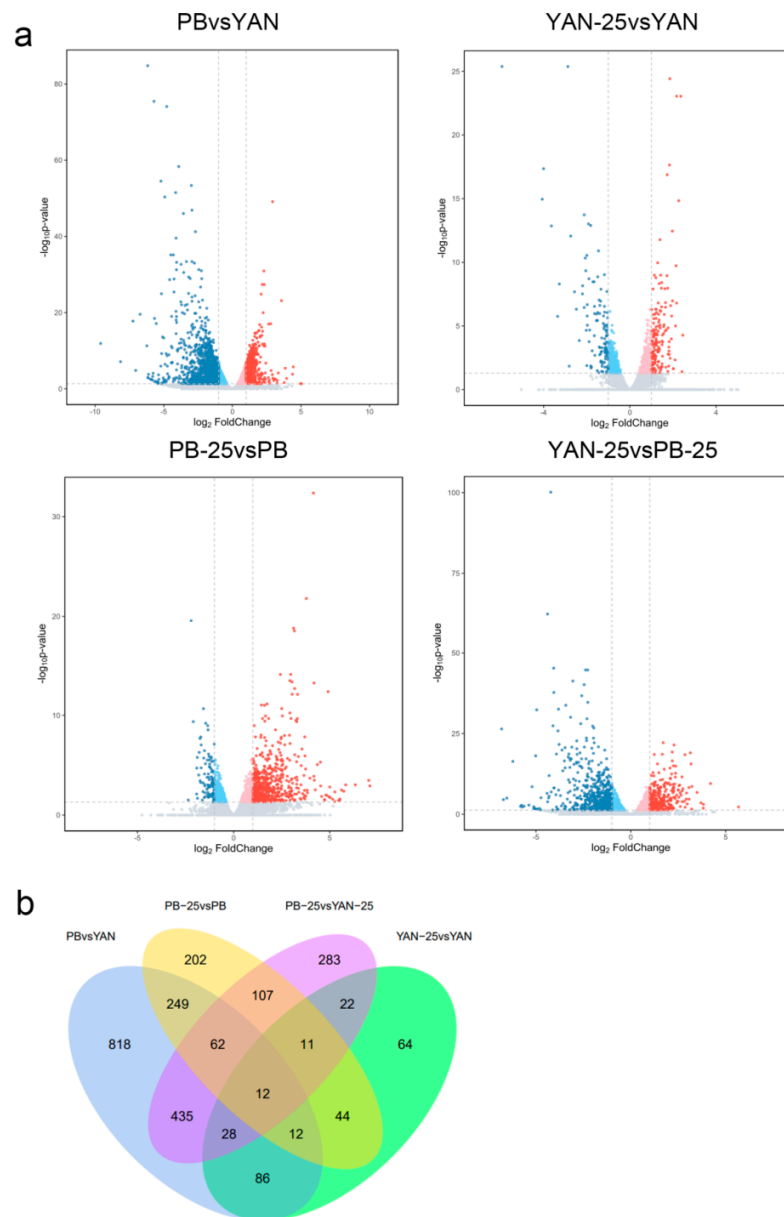

**Figure S2.** Comparison of DEGs between different pairwise strain combinations. (a) Volcano plots of DEGs among PB vs. YAN, YAN-25 vs. YAN, PB-25 vs. PB, and PB-25 vs. YAN-25. (b) Venn diagram of DEGs among the four pairwise combinations.

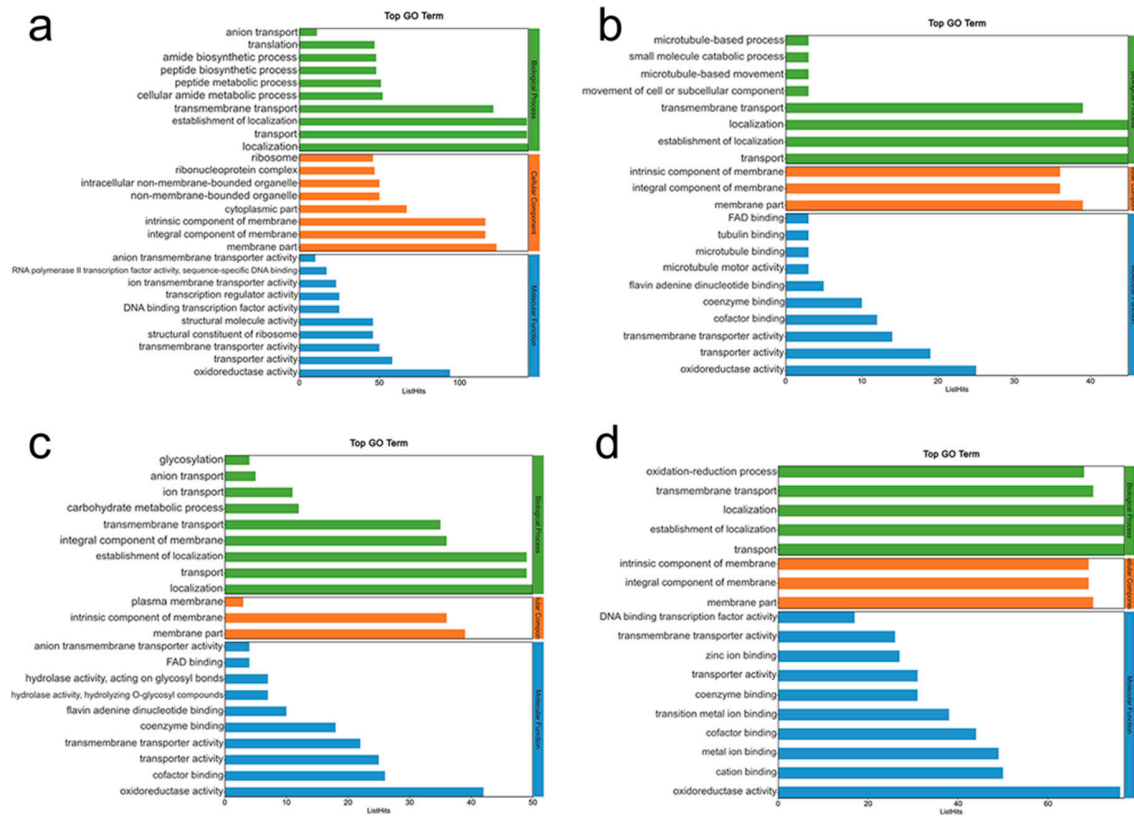

**Figure S3.** GO classification of DEGs in (a) PB vs. YAN, (b) YAN-25 vs. YAN, (c) PB-25 vs. PB, and (d) PB-25 vs. YAN-25.

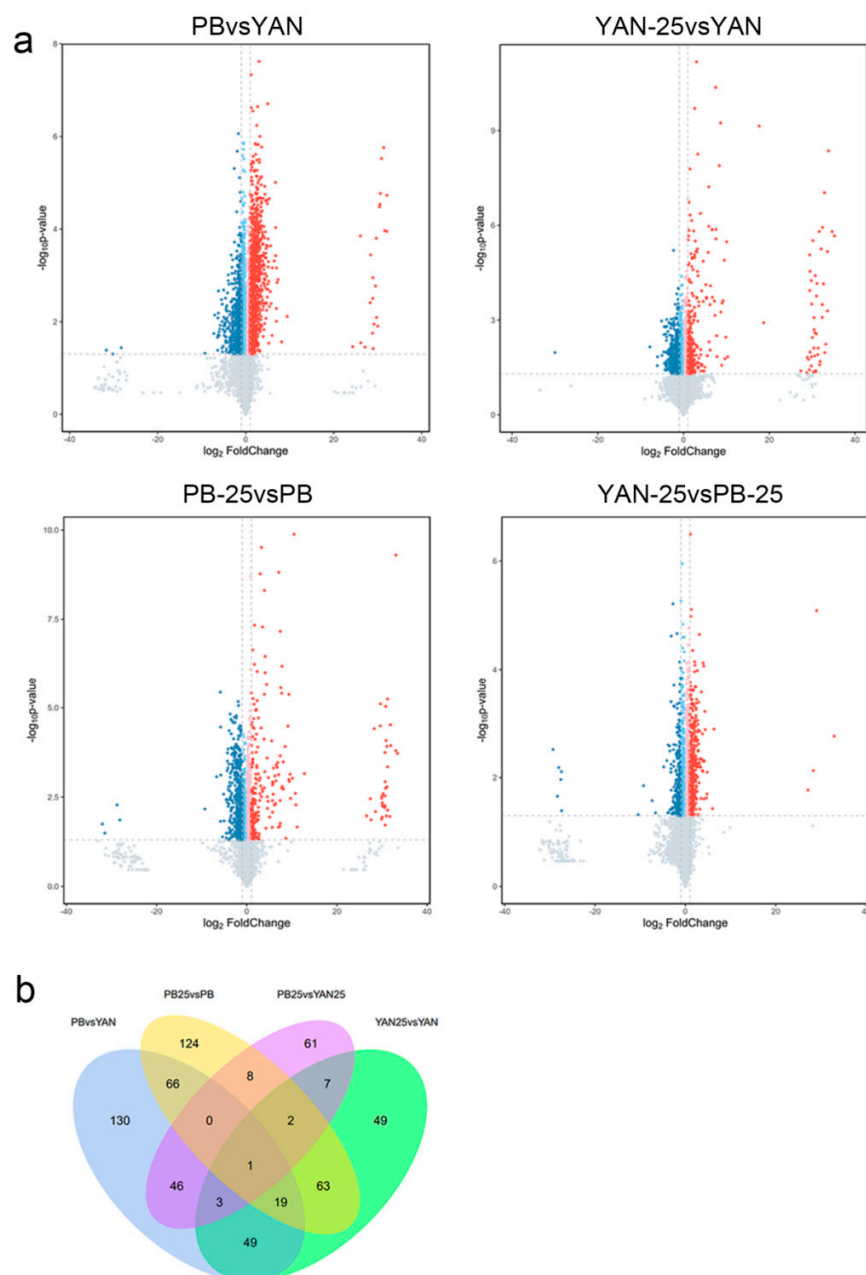

**Figure S4.** Differentially accumulated metabolites among the three comparisons. (a) Volcano plots of differentially expressed metabolites among PB vs. YAN, YAN-25 vs. YAN, PB-25 vs. PB, and PB-25 vs. YAN-25. (b) Venn diagram of differentially expressed metabolites among PB vs. YAN, YAN-25 vs. YAN, and PB-25 vs. PB.

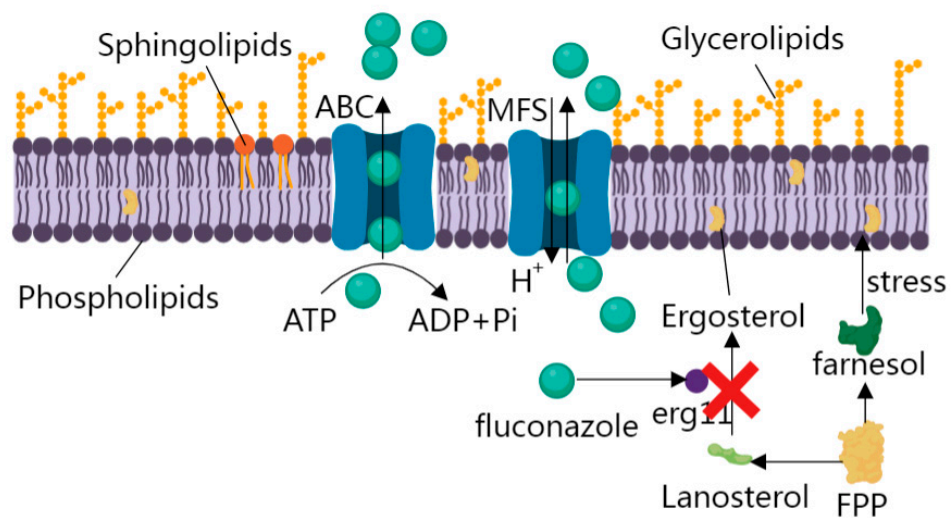

**Figure S5.** Mechanism underlying membrane lipid and efflux pump regulation that induces fluconazole resistance in fungi.

**Table S1.** Summary of sequencing reads mapping to the reference genome and quality parameters

| sample  | library       | raw_reads | clean_reads | clean_bases | error_rate | Q20   | Q30   | GC_pct |
|---------|---------------|-----------|-------------|-------------|------------|-------|-------|--------|
| YAN_1   | FRAS202093395 | 4487101   | 42794444    | 6.42G       | 0.02       | 98.19 | 94.78 | 62.03  |
|         | -1r           | 2         |             |             |            |       |       |        |
| YAN_2   | FRAS202093397 | 4406009   | 41910974    | 6.29G       | 0.02       | 98.33 | 95.12 | 61.65  |
|         | -1r           | 0         |             |             |            |       |       |        |
| YAN_3   | FRAS202093398 | 42742116  | 40836316    | 6.13G       | 0.02       | 98.32 | 95.06 | 61.58  |
|         | -1r           |           |             |             |            |       |       |        |
| PB_1    | FRAS202093399 | 4664279   | 45090860    | 6.76G       | 0.02       | 98.24 | 95.01 | 62     |
|         | -1r           | 8         |             |             |            |       |       |        |
| PB_2    | FRAS202093400 | 4159246   | 40291430    | 6.04G       | 0.02       | 98.18 | 94.82 | 62.02  |
|         | -1r           | 0         |             |             |            |       |       |        |
| PB_3    | FRAS202093402 | 4547081   | 43387926    | 6.51G       | 0.02       | 98.24 | 94.97 | 62.23  |
|         | -1r           | 4         |             |             |            |       |       |        |
| YAN25_1 | FRAS202093403 | 4166635   | 40312540    | 6.05G       | 0.02       | 98.16 | 94.64 | 62.29  |
|         | -1r           | 8         |             |             |            |       |       |        |
| YAN25_2 | FRAS202093404 | 5239685   | 51163252    | 7.67G       | 0.02       | 98.15 | 94.68 | 62.24  |
|         | -1r           | 0         |             |             |            |       |       |        |
| YAN25_3 | FRAS202093405 | 4186016   | 39508866    | 5.93G       | 0.02       | 98.23 | 94.95 | 62.27  |
|         | -1r           | 6         |             |             |            |       |       |        |
| PB25_1  | FRAS202093408 | 4740169   | 45605730    | 6.84G       | 0.02       | 98.14 | 94.78 | 61.88  |
|         | -1r           | 8         |             |             |            |       |       |        |
| PB25_2  | FRAS202093409 | 4676964   | 44507278    | 6.68G       | 0.02       | 98.19 | 94.91 | 61.73  |
|         | -1r           | 2         |             |             |            |       |       |        |
| PB25_3  | FRAS202093410 | 4579023   | 44563098    | 6.68G       | 0.02       | 98.12 | 94.72 | 61.73  |
|         | -1r           | 6         |             |             |            |       |       |        |

**Table S2.** Summary of sequencing reads mapping to the reference genome and quality parameters

| sample   | total_reads  | total_map            | unique_map           | multi_map         | read1_map            | read2_map            | positive_map         | negative_map         | splice_map           | unsplice_map         | proper_map           |
|----------|--------------|----------------------|----------------------|-------------------|----------------------|----------------------|----------------------|----------------------|----------------------|----------------------|----------------------|
| YA_N_1   | 4279<br>4444 | 3870229<br>2(90.44%) | 3847132<br>9(89.9%)  | 23096<br>3(0.54%) | 1927936<br>9(45.05%) | 1919196<br>0(44.85%) | 1915680<br>8(44.76%) | 1931452<br>1(45.13%) | 8434684<br>(19.71%)  | 3003664<br>5(70.19%) | 3659977<br>6(85.52%) |
| YA_N_2   | 4191<br>0974 | 3785011<br>1(90.31%) | 3765225<br>2(89.84%) | 19785<br>9(0.47%) | 1885200<br>4(44.98%) | 1880024<br>8(44.86%) | 1873726<br>7(44.71%) | 1891498<br>5(45.13%) | 7421896<br>(17.71%)  | 3023035<br>6(72.13%) | 3577960<br>8(85.37%) |
| YA_N_3   | 4083<br>6316 | 3648979<br>5(89.36%) | 3628586<br>1(88.86%) | 20393<br>4(0.5%)  | 1817611<br>7(44.51%) | 1810974<br>4(44.35%) | 1803529<br>6(44.16%) | 1825056<br>5(44.69%) | 7799035<br>(19.1%)   | 2848682<br>6(69.76%) | 3479512<br>2(85.21%) |
| PB_1     | 4509<br>0860 | 4083803<br>4(90.57%) | 4058029<br>1(90.0%)  | 25774<br>3(0.57%) | 2033354<br>6(45.09%) | 2024674<br>5(44.9%)  | 2024652<br>6(44.9%)  | 2033376<br>5(45.1%)  | 9908331<br>(21.97%)  | 3067196<br>0(68.02%) | 3876950<br>4(85.98%) |
| PB_2     | 4029<br>1430 | 3634838<br>9(90.21%) | 3611438<br>7(89.63%) | 23400<br>2(0.58%) | 1809565<br>9(44.91%) | 1801872<br>8(44.72%) | 1802070<br>7(44.73%) | 1809368<br>0(44.91%) | 8742555<br>(21.7%)   | 2737183<br>2(67.93%) | 3448667<br>0(85.59%) |
| PB_3     | 4338<br>7926 | 3969761<br>5(91.49%) | 3947235<br>8(90.98%) | 22525<br>7(0.52%) | 1975701<br>9(45.54%) | 1971533<br>9(45.44%) | 1969321<br>0(45.39%) | 1977914<br>8(45.59%) | 9772507<br>(22.52%)  | 2969985<br>1(68.45%) | 3790332<br>0(87.36%) |
| YA_N25_1 | 4031<br>2540 | 3666368<br>6(90.95%) | 3641283<br>7(90.33%) | 25084<br>9(0.62%) | 1819700<br>1(45.14%) | 1821583<br>6(45.19%) | 1815617<br>7(45.04%) | 1825666<br>0(45.29%) | 8305684<br>(20.6%)   | 2810715<br>3(69.72%) | 3488787<br>4(86.54%) |
| YA_N25_2 | 5116<br>3252 | 4645840<br>8(90.8%)  | 4612186<br>8(90.15%) | 33654<br>0(0.66%) | 2311081<br>8(45.17%) | 2301105<br>0(44.98%) | 2299270<br>8(44.94%) | 2312916<br>0(45.21%) | 1029959<br>2(20.13%) | 3582227<br>6(70.02%) | 4390091<br>2(85.81%) |
| YA_N25_3 | 3950<br>8866 | 3586624<br>5(90.78%) | 3561196<br>3(90.14%) | 25428<br>2(0.64%) | 1782848<br>7(45.13%) | 1778347<br>6(45.01%) | 1775435<br>4(44.94%) | 1785760<br>9(45.2%)  | 8330195<br>(21.08%)  | 2728176<br>8(69.05%) | 3415362<br>2(86.45%) |
| PB2_5_1  | 4560<br>5730 | 4129445<br>1(90.55%) | 4097437<br>7(89.84%) | 32007<br>4(0.7%)  | 2055064<br>7(45.06%) | 2042373<br>0(44.78%) | 2040814<br>4(44.75%) | 2056623<br>3(45.1%)  | 9852696<br>(21.6%)   | 3112168<br>1(68.24%) | 3906946<br>8(85.67%) |
| PB2_5_2  | 4450<br>7278 | 4007876<br>4(90.05%) | 3977536<br>8(89.37%) | 30339<br>6(0.68%) | 1994208<br>7(44.81%) | 1983328<br>1(44.56%) | 1980244<br>7(44.49%) | 1997292<br>1(44.88%) | 9632438<br>(21.64%)  | 3014293<br>0(67.73%) | 3790876<br>6(85.17%) |
| PB2_5_3  | 4456<br>3098 | 3975436<br>9(89.21%) | 3936291<br>7(88.33%) | 39145<br>2(0.88%) | 1974326<br>3(44.3%)  | 1961965<br>4(44.03%) | 1962066<br>2(44.03%) | 1974225<br>5(44.3%)  | 9345783<br>(20.97%)  | 3001713<br>4(67.36%) | 3734566<br>2(83.8%)  |
